# Supplementary material
Source: PubMed Central journal article supplement (PMC8106670)
Supplement: NIHMS1683470-supplement-1.pdf [file NIHMS1683470-supplement-1.pdf]

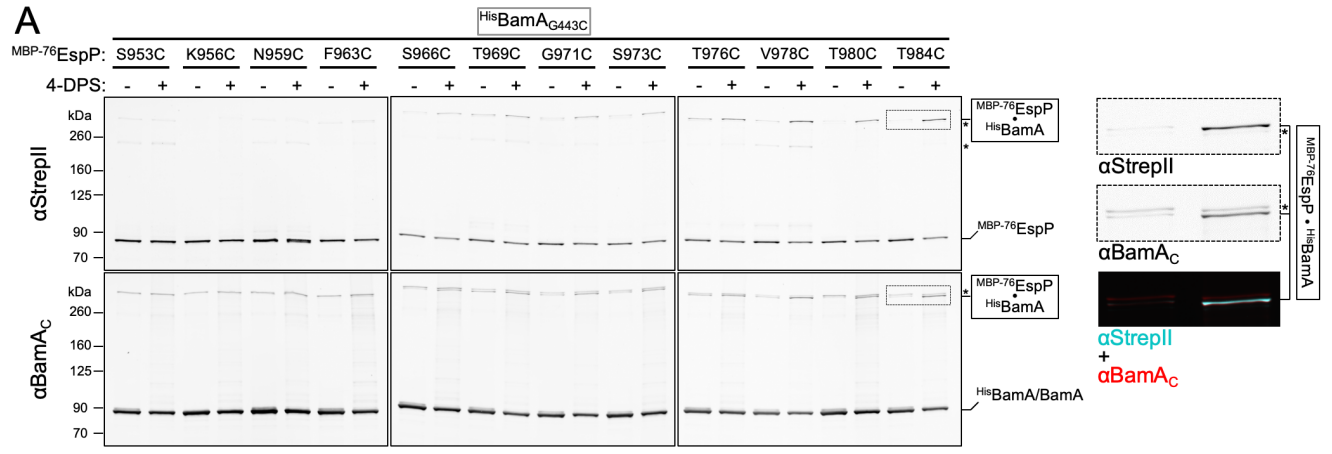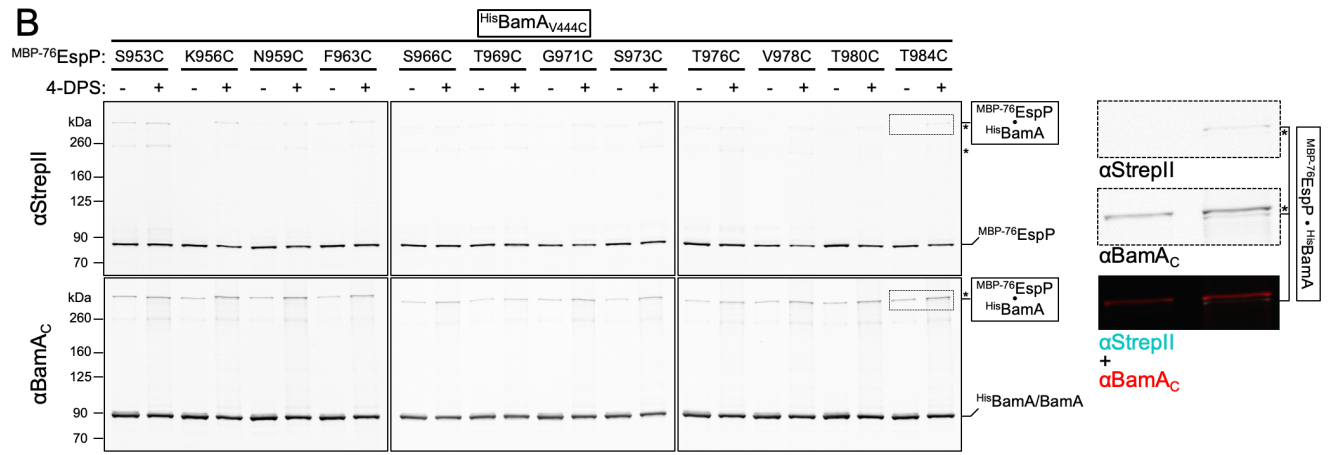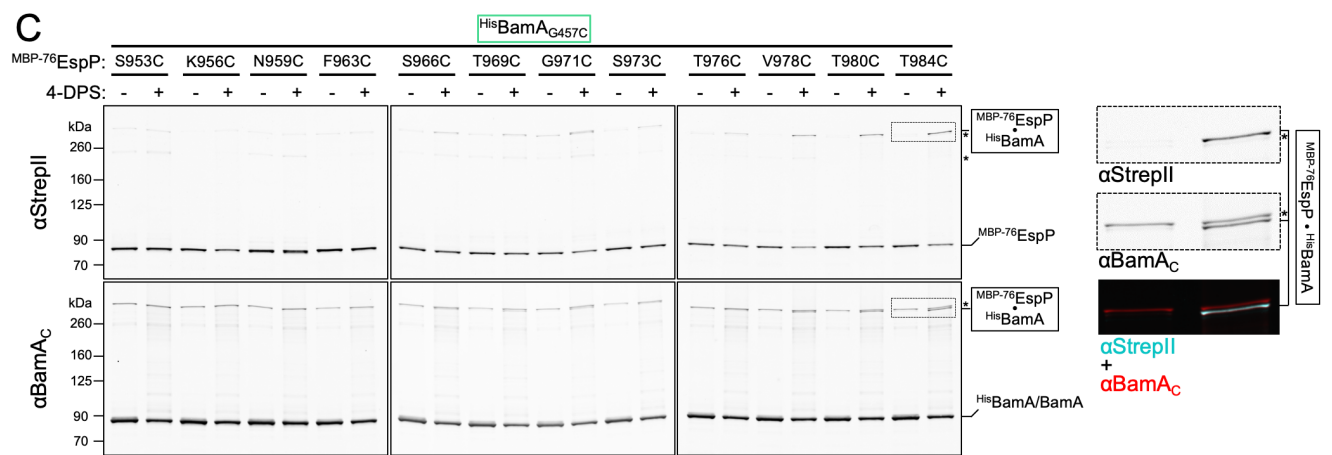

Supplementary Figure 1 (legend next page)

**Supplementary Figure 1: Identification of disulfide-bonds between <sup>His</sup>BamA G443C, V444C, or G457C and <sup>MBP-76</sup>EspP passenger domain cysteine mutants, relating to Figure 2.**

*E. coli* BL21(DE3) transformed with a plasmid expressing <sup>MBP-76</sup>EspP with a single cysteine substitution at the indicated residue and a plasmid expressing <sup>His</sup>BamA<sub>G443C</sub>BCDE (**A**), <sup>His</sup>BamA<sub>V444C</sub>BCDE (**B**), or <sup>His</sup>BamA<sub>G457C</sub>BCDE (**C**) were mock treated (-) or treated with 4-DPS (+), N = 3. Proteins were then detected by double-immunoblot using  $\alpha$ StrepII antibodies (top) and  $\alpha$ BamA<sub>C</sub> (bottom) antiserum to monitor disulfide-bond formation between cysteine pairs *in vivo* (•). Right, magnification of boxed regions of immunoblots showing examples of disulfide-bonds detected between <sup>His</sup>BamA cysteine positions and <sup>MBP-76</sup>EspP<sub>T984C</sub>. In the bottom panel, the  $\alpha$ StrepII (cyan) and  $\alpha$ BamA<sub>C</sub> (red) signals were overlaid. Non-specific side-reactions are denoted (\*).

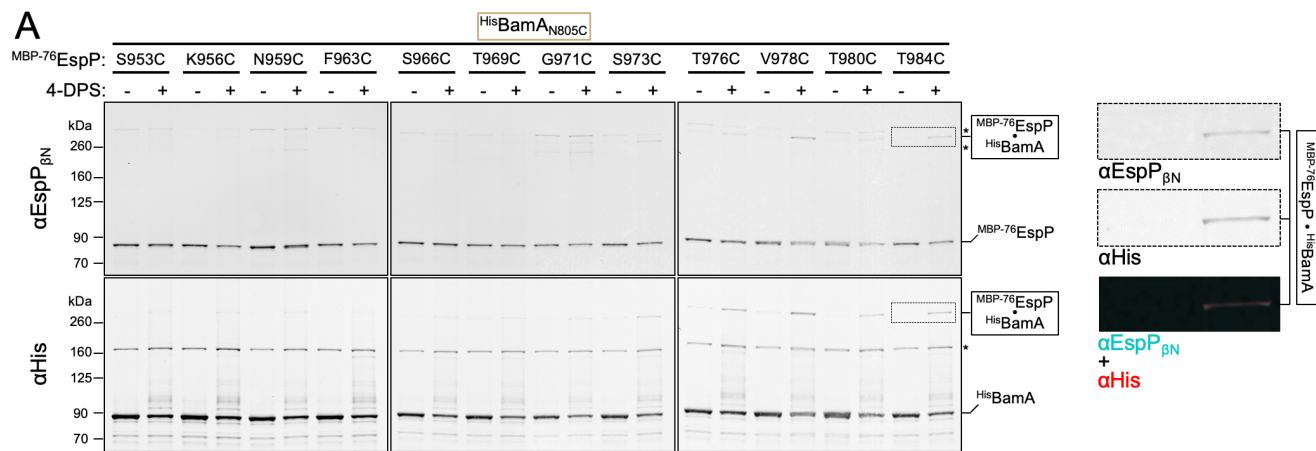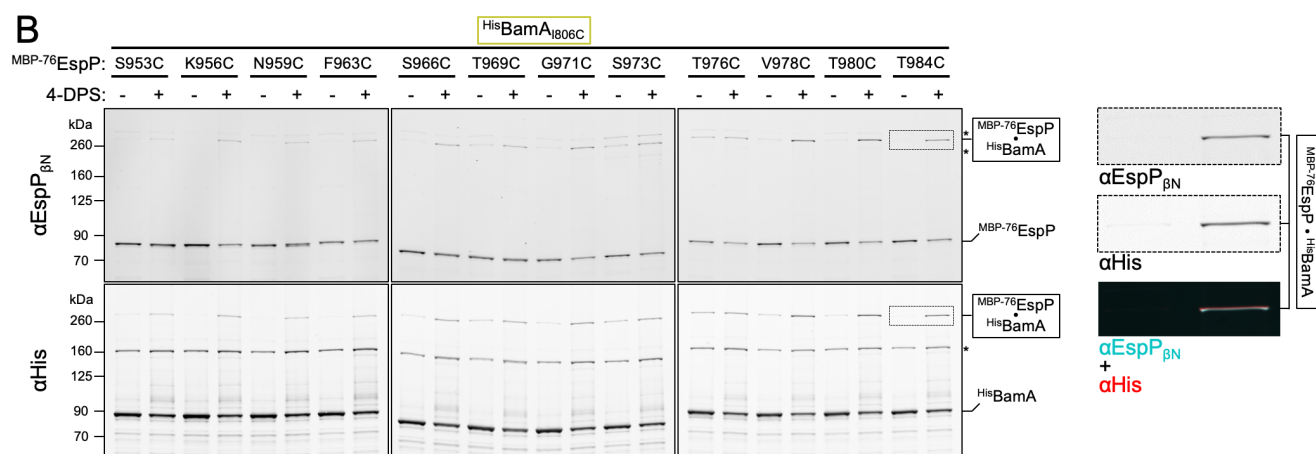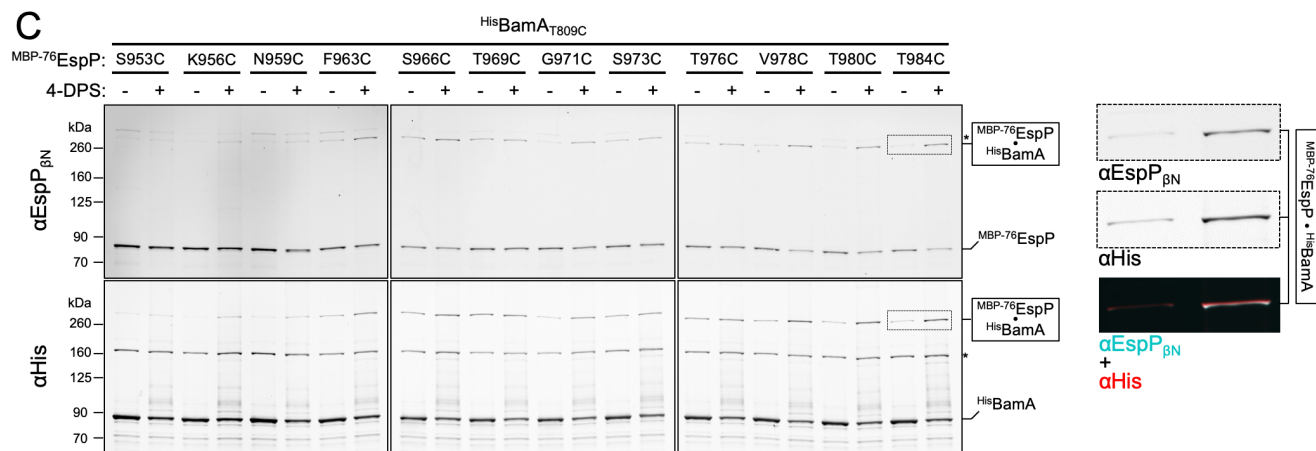

Supplementary Figure 2 (legend next page)

**Supplementary Figure 2: Identification of disulfide-bonds between <sup>His</sup>BamA N805C, I806C, or T809C and <sup>MBP-76</sup>EspP passenger domain cysteine mutants, relating to Figure 2.**

*E. coli* BL21(DE3) transformed with a plasmid expressing <sup>MBP-76</sup>EspP with a single cysteine substitution at the indicated residue and a plasmid expressing <sup>His</sup>BamA<sub>N805C</sub>BCDE (**A**), <sup>His</sup>BamA<sub>I806C</sub>BCDE (**B**), or <sup>His</sup>BamA<sub>T809C</sub>BCDE (**C**) were mock treated (-) or treated with 4-DPS (+), N = 3. Proteins were then detected by double-immunoblot using an antiserum against EspP<sub>βN</sub> (top) and antibodies against the N-terminus of <sup>His</sup>BamA (αHis) (bottom) to monitor disulfide-bond formation between cysteine pairs *in vivo* (•). Right, magnification of boxed regions of immunoblots showing examples of disulfide-bonds detected between <sup>His</sup>BamA cysteine positions and <sup>MBP-76</sup>EspP<sub>T984C</sub>. In the bottom panel the αEspP<sub>βN</sub> (cyan) and αHis (red) signals were overlaid. Non-specific side-reactions are denoted (\*).

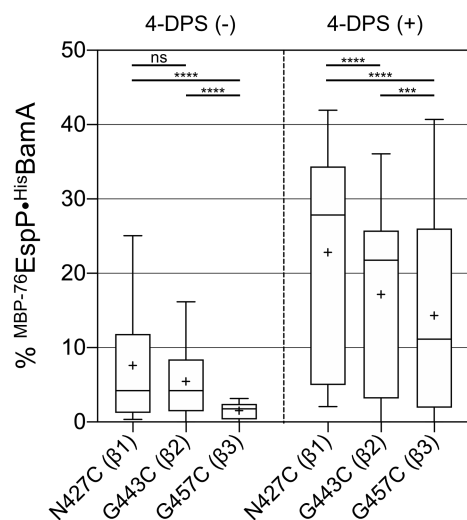

**Supplementary Figure 3: The EspP passenger domain forms disulfide-bonds most efficiently with BamAβ1 and least efficiently with BamAβ3, relating to Figure 2B.**

Box and whisker plots of mean disulfide-bond formation levels (•) of all MBP-76EspP passenger domain cysteine substitution mutants with HisBamA<sub>N427C</sub>, HisBamA<sub>G443C</sub>, and HisBamA<sub>G457C</sub> substitution mutants in Figure 2B. Whiskers: data range; plus symbols on boxes: mean-of-means. ANOVA and multiple comparisons tests are provided in Table S1.

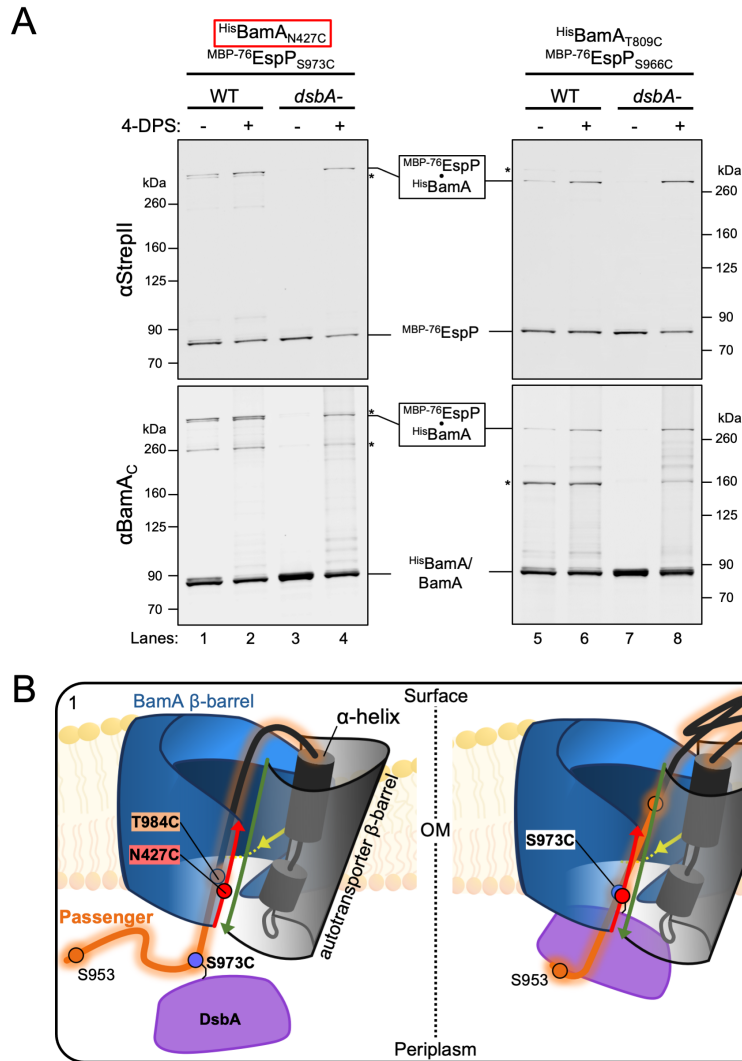

**Supplementary Figure 4: Spatially-restricted disulfide-bond formation in the absence of 4-DPS is DsbA-dependent, relating to Figure 2.**

**(A)** *E. coli* AD202 and RI2 (AD202 *dsbA*<sup>-</sup>) that expressed MBP-76EspP<sub>S973C</sub>/HisBamA<sub>N427C</sub> or MBP-76EspP<sub>S966C</sub>/HisBamA<sub>T809C</sub> were mock treated (-) or treated with 4-DPS (+). Proteins were then detected by double-immunoblot using αStreptII (top) and αBamA<sub>C</sub> (bottom) to monitor disulfide-bond formation between cysteine pairs *in vivo* (•), N = 2. Non-specific side-reactions are denoted (\*). **(B)** Model of DsbA-dependent disulfide bond formation that explains 4-DPS (-) data in Figure 2b. A cysteine in DsbA initially forms a disulfide bond with the exposed passenger in the periplasm (1) that is exchanged with a cysteine in BamA when the passenger enters the channel (2). Steric hinderance by the channel inhibits disulfide bonding between the C-terminal region of the passenger and DsbA. The MBP moiety immediately upstream of S953 prevents entry of the N-terminus of the passenger into the channel. Relevant MBP-76EspP and HisBamA cysteine substitutions are depicted.

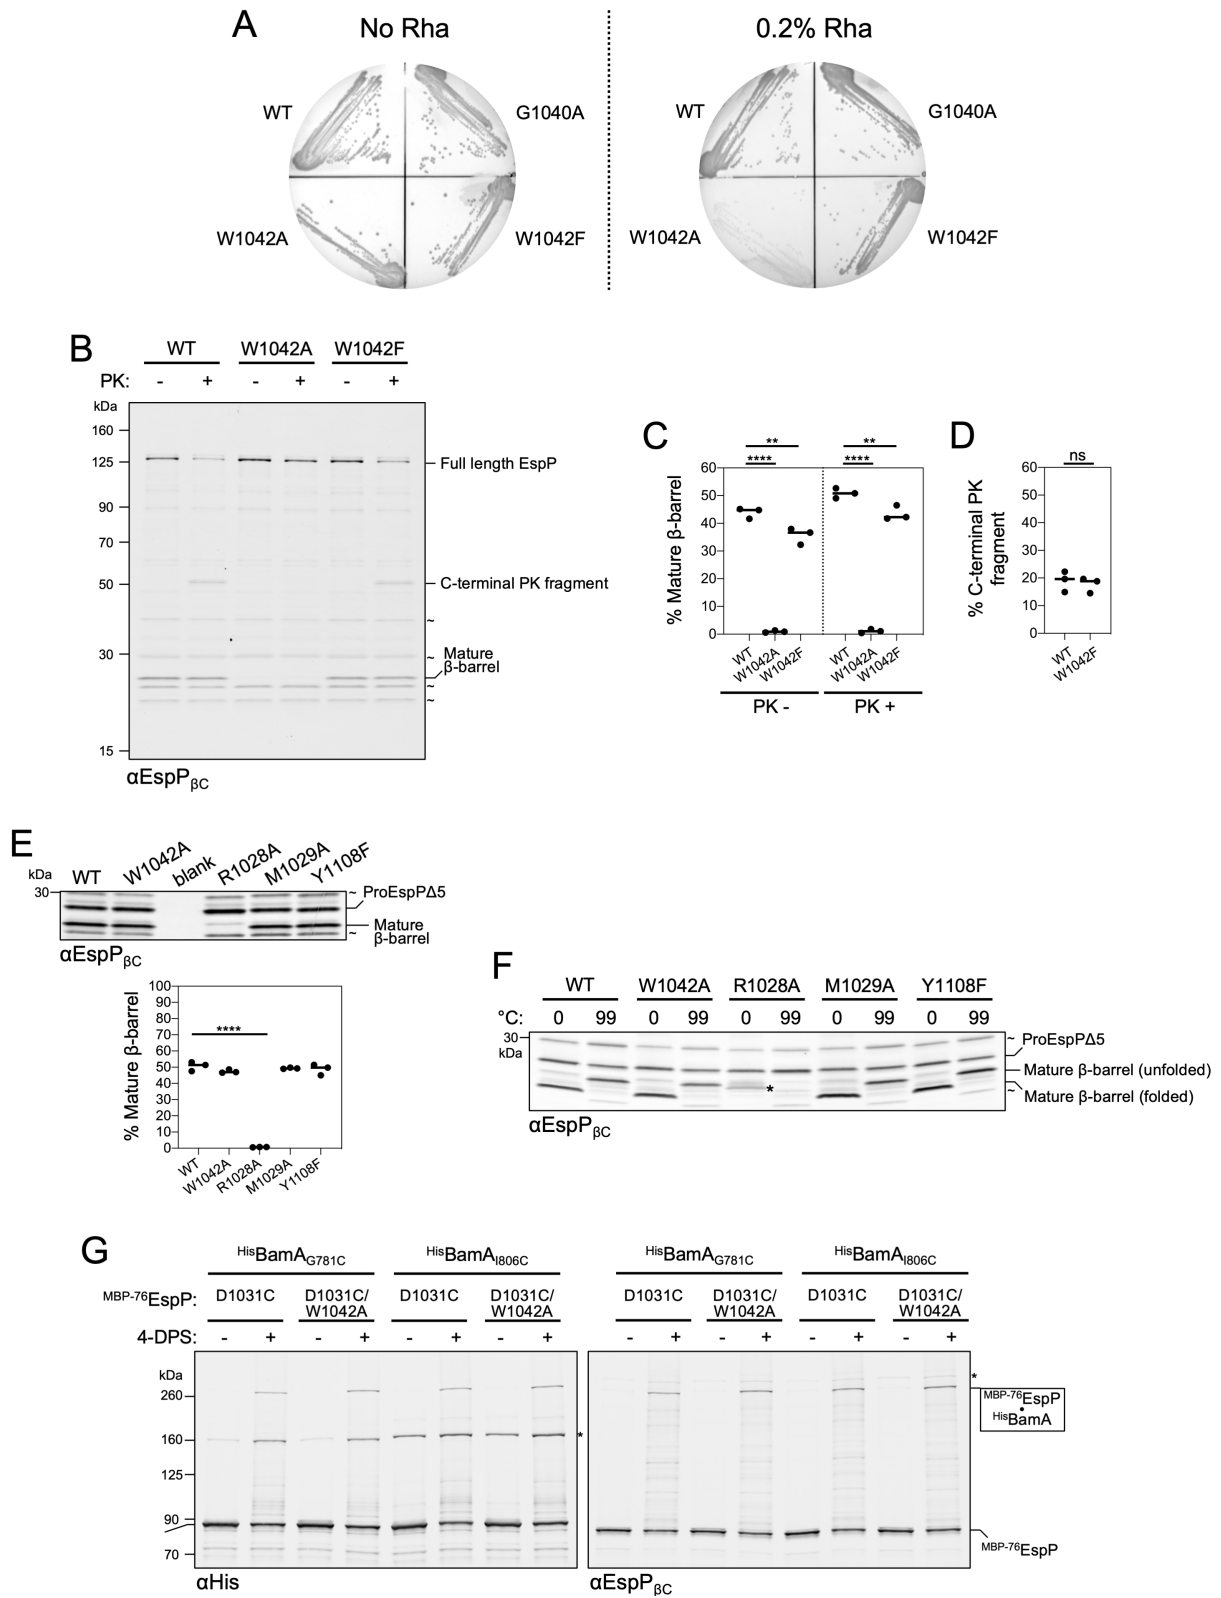

Supplementary Figure 5 (legend next page)

**Supplementary Figure 5: Characterization of W1040 mutant phenotypes, and assembly and structural effects, relating to Figures 4 and 5.**

(A) *E. coli* AD202 transformed with a plasmid that expresses EspP $\Delta$ 1, EspP $\Delta$ 1<sub>G1040A</sub>, EspP $\Delta$ 1<sub>W1042A</sub>, or EspP $\Delta$ 1<sub>W1042F</sub> were streaked on LB agar with or without 0.2% L-rhamnose and incubated at 37 °C for 16 h. N = 2. (B,C,D) *E. coli* AD202 that expressed wild-type EspP, EspP<sub>W1042A</sub> or EspP<sub>W1042F</sub> were either mock treated or treated with PK. Assembly of the protein into a mature cleaved  $\beta$ -barrel was monitored by immunoblotting (B) using an antiserum against the EspP  $\beta$ -barrel C-terminus ( $\alpha$ EspP <sub>$\beta$ C</sub>). Non-specific bands are denoted (~). Levels of mature  $\beta$ -barrel (C) and C-terminal PK fragments (D) were quantified (lines at median, N = 3). For ANOVA and multiple comparisons tests see Table S1. (E) Experiment conducted as in B except bacteria expressed EspP $\Delta$ 5 or an EspP $\Delta$ 5 substitution mutant. Example immunoblot (top) and quantified (bottom). Lines at median, N = 3. ANOVA and multiple comparisons tests are in Supplementary Table S1. Non-specific bands are denoted (~). (F) Experiment conducted as in B and E except that cells were lysed and lysates were either not heated (0 °C) or heated (99 °C) before proteins were resolved by cold-SDS-PAGE. N = 2. The folded form of proEspP $\Delta$ 5<sub>R1028A</sub> (\*) and non-specific bands (~) are denoted. (G) *E. coli* BL21(DE3) expressing <sup>His</sup>BamA<sub>G781C</sub>BCDE or <sup>His</sup>BamA<sub>I806C</sub>BCDE and <sup>MBP-76</sup>EspP<sub>D1031C</sub> with or without the W1042A substitution were mock treated (-) or treated with 4-DPS (+) (N = 2). Proteins were then detected by double-immunoblot using  $\alpha$ His (left) and  $\alpha$ EspP <sub>$\beta$ C</sub> (right) to monitor disulfide-bond formation between cysteine pairs (•). Side-reactions are denoted (\*).



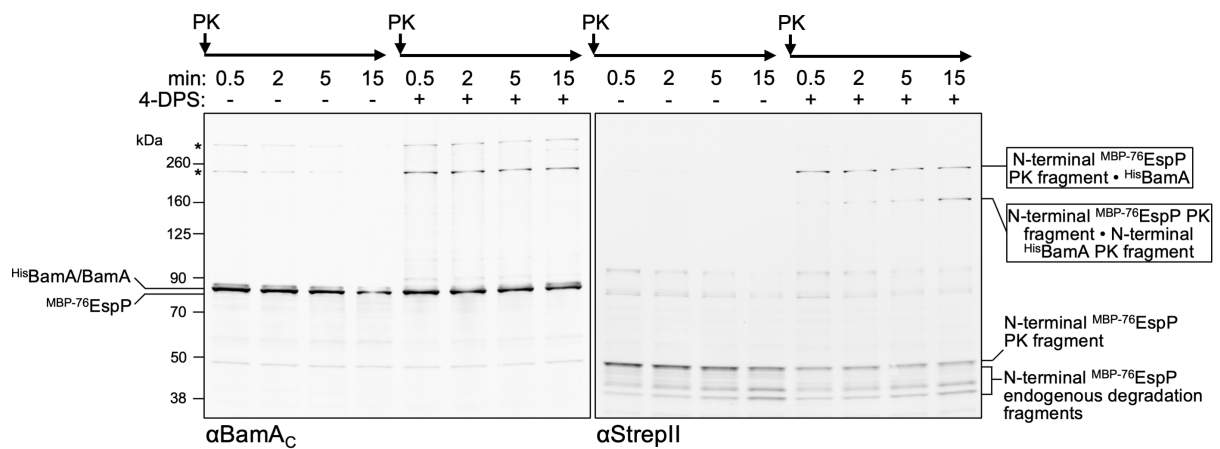

**Supplementary Figure 6: Arrest-release assembly assay samples double-immunoblotted with  $\alpha$ BamA<sub>C</sub> and  $\alpha$ StrepII, related to Figure 6.**

*E. coli* BL21(DE3) transformed with plasmids expressing HisBamA<sub>N427C</sub>BCDE and MBP-76EspP<sub>T984C</sub> were mock treated (-) or treated with 4-DPS (+) and subsequently incubated with PK for up to 15 min. Proteins were detected by double-immunoblot using  $\alpha$ BamA (left) antiserum and  $\alpha$ StrepII (right) antibodies. Combined with data presented in Figure 6, these results show that the ~160 kDa fragment contains N-terminal PK fragments of both MBP-76EspP<sub>T984C</sub> and HisBamA<sub>N427C</sub> that are disulfide bonded. Side-reactions are denoted (\*).

| Plasmid         | Notes                                                                                                                                                                              | Source    |
|-----------------|------------------------------------------------------------------------------------------------------------------------------------------------------------------------------------|-----------|
| pRha-MBP-EspPA1 | pSCrhaB2:: <i>espP<sub>SS-malE-espP<sub>909-1300</sub></sub></i> , <i>P<sub>rhaB</sub></i> , <i>Temp<sup>R</sup></i>                                                               | 1         |
| pMTD372         | pTrc99a:: <i>His8bamABCDE</i> , <i>P<sub>Trc</sub></i> , <i>Amp<sup>R</sup></i>                                                                                                    | 1         |
| pMTD607         | 'pRha <sup>MBP-76</sup> EspP' (pSCrhaB2:: <i>espP<sub>SS-TS-malE-espP<sub>948-984-tev-espP<sub>985-1300</sub></sub></sub></i> ), <i>P<sub>rhaB</sub></i> , <i>Temp<sup>R</sup></i> | 1         |
| pMTD710         | pTrc99a:: <i>His8bamAS425C-BCDE</i>                                                                                                                                                | 1         |
| pMTD712         | pRha <sup>MBP-76</sup> EspP <sub>S1299C</sub>                                                                                                                                      | 1         |
| pMTD792         | pRha <sup>MBP-76</sup> EspP <sub>R1297C</sub>                                                                                                                                      | 1         |
| pMTD820         | pTrc99a:: <i>His8bamA7809C-BCDE</i>                                                                                                                                                | 1         |
| pMTD829         | pTrc99a:: <i>His8bamAN427C-BCDE</i>                                                                                                                                                | 1         |
| pMTD893         | pTrc99a:: <i>His8bamAG781C-BCDE</i>                                                                                                                                                | 1         |
| pMTD896         | pTrc99a:: <i>His8bamAN805C-BCDE</i>                                                                                                                                                | 1         |
| pMTD957         | pTrc99a:: <i>His8bamA1806C-BCDE</i>                                                                                                                                                | 1         |
| pMTD1029        | pTrc99a:: <i>His8bamAG443C-BCDE</i>                                                                                                                                                | 1         |
| pJH207          | 'pRhaEspPA5' [pSCrhaB2:: <i>ompA<sub>SS-espP<sub>998-1300</sub></sub></i> ( <i>espPA5</i> )], <i>P<sub>rhaB</sub></i> , <i>Temp<sup>R</sup></i>                                    | 2         |
| pWK21           | 'pRhaEspP' [pSCrhaB2:: <i>espP</i> ], <i>P<sub>rhaB</sub></i> , <i>Temp<sup>R</sup></i>                                                                                            | 3         |
| pMTD405         | 'pRhaEspPA1' [pSCrhaB2:: <i>espP<sub>SS-TS-espP<sub>909-1300</sub></sub></i> ( <i>espPA1</i> )]                                                                                    | This work |
| pMTD802         | pRha <sup>MBP-76</sup> EspP <sub>S953C</sub> ( <i>espP<sub>S953C</sub></i> substitution via QC on pMTD607 with mtd224/225 primers)                                                 | This work |
| pMTD804         | pRha <sup>MBP-76</sup> EspP <sub>K956C</sub> ( <i>espP<sub>K956C</sub></i> substitution via QC on pMTD607 with mtd226/227 primers)                                                 | This work |
| pMTD806         | pRha <sup>MBP-76</sup> EspP <sub>N959C</sub> ( <i>espP<sub>N959C</sub></i> substitution via QC on pMTD607 with mtd228/229 primers)                                                 | This work |
| pMTD808         | pRha <sup>MBP-76</sup> EspP <sub>F963C</sub> ( <i>espP<sub>F963C</sub></i> substitution via QC on pMTD607 with mtd230/231 primers)                                                 | This work |
| pMTD810         | pRha <sup>MBP-76</sup> EspP <sub>S966C</sub> ( <i>espP<sub>S966C</sub></i> substitution via QC on pMTD607 with mtd232/233 primers)                                                 | This work |
| pMTD812         | pRha <sup>MBP-76</sup> EspP <sub>T976C</sub> ( <i>espP<sub>T976C</sub></i> substitution via QC on pMTD607 with mtd238/239 primers)                                                 | This work |
| pMTD813         | pRha <sup>MBP-76</sup> EspP <sub>T980C</sub> ( <i>espP<sub>T980C</sub></i> substitution via QC on pMTD607 with mtd240/241 primers)                                                 | This work |
| pMTD886         | pRha <sup>MBP-76</sup> EspP <sub>S973C</sub> ( <i>espP<sub>S973C</sub></i> substitution via QC on pMTD607 with mtd236/237 primers)                                                 | This work |
| pMTD899         | pRha <sup>MBP-76</sup> EspP <sub>T969C</sub> ( <i>espP<sub>T969C</sub></i> substitution via QC on pMTD607 with mtd234/235 primers)                                                 | This work |
| pMTD1115        | pRha <sup>MBP-76</sup> EspP <sub>W1042A/S1299C</sub> ( <i>espP<sub>W1042A/S1299C</sub></i> substitution via QC on pMTD712 with mtd295/296 primers)                                 | This work |
| pMTD1144        | pRhaEspPA1 <sub>W1042A</sub> ( <i>espPA1<sub>W1042A</sub></i> substitution via QC on pMTD405 with mtd295/296 primers)                                                              | This work |
| pMTD1166        | pRhaEspPA5 <sub>W1042A</sub> ( <i>espPA5<sub>W1042A</sub></i> substitution via QC on pJH207 with mtd295/296 primers)                                                               | This work |
| pMTD1293        | pRha <sup>MBP-76</sup> EspP <sub>V978C</sub> ( <i>espP<sub>V978C</sub></i> substitution via QC on pMTD607 with mtd313/314 primers)                                                 | This work |
| pMTD1294        | pRha <sup>MBP-76</sup> EspP <sub>G971C</sub> ( <i>espP<sub>G971C</sub></i> substitution via QC on pMTD607 with mtd309/310 primers)                                                 | This work |
| pMTD1316        | pTrc99a:: <i>His8bamAV444C-BCDE</i> ( <i>bamAV444C</i> substitution via QC on pMTD372 with mtd322/323 primers)                                                                     | This work |
| pMTD1317        | pTrc99a:: <i>His8bamAG457C-BCDE</i> ( <i>bamAG457C</i> substitution via QC on pMTD372 with mtd324/325 primers)                                                                     | This work |
| pMTD1369        | pRhaEspPA1 <sub>G1040A</sub> ( <i>espPA1<sub>G1040A</sub></i> substitution via QC on pMTD405 with mtd293/294 primers)                                                              | This work |
| pMTD1370        | pRhaEspPA1 <sub>W1042F</sub> ( <i>espPA1<sub>W1042F</sub></i> substitution via QC on pMTD405 with mtd297/298 primers)                                                              | This work |
| pMTD1373        | pRha <sup>MBP-76</sup> EspP <sub>T984C</sub> ( <i>espP<sub>T984C</sub></i> substitution via QC on pMTD607 with mtd330/331 primers)                                                 | This work |
| pMTD1423        | pRha <sup>MBP-76</sup> EspP <sub>T984C/W1042A</sub> ( <i>espP<sub>W1042A</sub></i> substitution via QC on pMTD1373 with mtd295/296 primers)                                        | This work |
| pMTD1443        | pRha <sup>MBP-76</sup> EspP <sub>S966C/W1042A</sub> ( <i>espP<sub>W1042A</sub></i> substitution via QC on pMTD810 with mtd295/296 primers)                                         | This work |
| pMTD1446        | pRha <sup>MBP-76</sup> EspP <sub>R1028A</sub> ( <i>espP<sub>R1028A</sub></i> substitution via QC on pMTD607 with mtd341/342 primers)                                               | This work |
| pMTD1449        | pRha <sup>MBP-76</sup> EspP <sub>D1031C</sub> ( <i>espP<sub>D1031C</sub></i> substitution via QC on pMTD607 with mtd345/346 primers)                                               | This work |
| pMTD1450        | pRha <sup>MBP-76</sup> EspP <sub>Y1108F</sub> ( <i>espP<sub>Y1108F</sub></i> substitution via QC on pMTD607 with mtd347/348 primers)                                               | This work |
| pMTD1464        | pRha <sup>MBP-76</sup> EspP <sub>M1029A</sub> ( <i>espP<sub>M1029A</sub></i> substitution via QC on pMTD607 with mtd343/344 primers)                                               | This work |
| pMTD1472        | pRha <sup>MBP-76</sup> EspP <sub>N1026C</sub> ( <i>espP<sub>N1026C</sub></i> substitution via QC on pMTD607 with mtd339/340 primers)                                               | This work |
| pMTD1479        | pRha <sup>MBP-76</sup> EspP <sub>W1042A</sub> ( <i>espP<sub>W1042A</sub></i> substitution via QC on pMTD607 with mtd295/296 primers)                                               | This work |
| pMTD1481        | pRha <sup>MBP-76</sup> EspP <sub>D1031C/W1042A</sub> ( <i>espP<sub>D1031C/W1042A</sub></i> substitution via QC on pMTD1449 with mtd295/296 primers)                                | This work |
| pMTD1498        | pRha <sup>MBP-76</sup> EspP <sub>N1026C/W1042A</sub> ( <i>espP<sub>N1026C/W1042A</sub></i> substitution via QC on pMTD1472 with mtd295/296 primers)                                | This work |
| pMTD1505        | pRha <sup>MBP-76</sup> EspP <sub>W1042F</sub> ( <i>espP<sub>W1042F</sub></i> substitution via QC on pMTD607 with mtd297/298 primers)                                               | This work |
| pMTD1510        | pRhaEspP <sub>W1042A</sub> ( <i>espP<sub>W1042A</sub></i> substitution via QC on pWK21 with mtd295/296 primers)                                                                    | This work |
| pMTD1511        | pRhaEspP <sub>W1042F</sub> ( <i>espP<sub>W1042F</sub></i> substitution via QC on pWK21 with mtd297/298 primers)                                                                    | This work |

**Supplementary Table 2: Plasmids used in this study, related to STAR Methods.**

Abbreviations: SS = signal sequence, *malE* = *malE* codons 26-392, MBP = maltose binding protein (26-392), Amp<sup>R</sup> = Ampicillin resistance, Tmp<sup>R</sup> = Trimethoprim resistance, TS = TwinStrepII tag, His/His8 = His x 8 tag, QC = QuikChange site directed mutagenesis, GA = Gibson Assembly.

- (1) Doyle, M.T., and Bernstein, H.D. (2019) Bacterial outer membrane proteins assemble via asymmetric interactions with the BamA  $\beta$ -barrel. *Nat Commun* 10, 3358.
- (2) Peterson, J.H., Plummer, A.M., Fleming, K.G., Bernstein, H.D. (2017) Selective pressure for rapid membrane integration constrains the sequence of bacterial outer membrane proteins. *Mol Microbiol* 106, 777-792.
- (3) Kang'ethe, W., and Bernstein, H.D. (2013) Charge-dependent secretion of an intrinsically disordered protein via the autotransporter pathway. *Proc Natl Acad Sci USA* 110, E4246-E4255.

(Supplementary Table 3)

| DNA                 | Sequence                                        | Notes                                                                                                                       |
|---------------------|-------------------------------------------------|-----------------------------------------------------------------------------------------------------------------------------|
| <b>ssDNA oligos</b> |                                                 |                                                                                                                             |
| mtd1                | TAATCATCCGGCTCGTATAATGTG                        | F, sequencing primer, pTrc99a                                                                                               |
| mtd20               | GGCATGGGGTCAGGTGG                               | R, sequencing primer, pTrc99a                                                                                               |
| mtd42               | CATCACGTTTCATCTTTCCCTGG                         | F, sequencing primer, pSCrhaB2                                                                                              |
| mtd43               | CGGCGCTACGGCGTTTCAC                             | R, sequencing primer, pSCrhaB2                                                                                              |
| mtd96               | GGCCGCAAAAAGAAATATGAGG                          | R, primer to linearize pMTD294 for TwinStrepII insertion (mtd95) between <i>espP(C)<sub>sp</sub></i> and <i>malE</i> via GA |
| mtd100              | GCTGAGCGCAGGTATTAACGC                           | F, sequencing primer, <i>malE</i> middle coding region                                                                      |
| mtd110              | ACCCAGGTCACTGACGCCAGAT                          | F, sequencing primer, <i>bamA</i> second (pTrc99a:: <i>His8bamABCDE</i> )                                                   |
| mtd111              | TGGTACAGACGTGACGTTGGGCTT                        | F, sequencing primer, <i>bamA</i> third (pTrc99a:: <i>His8bamABCDE</i> )                                                    |
| mtd112              | CTGGTGTTCAGGAAGGTGTGTCA                         | F, sequencing primer, <i>bamA</i> first (pTrc99a:: <i>His8bamABCDE</i> )                                                    |
| mtd113              | CGGGTATCGCATTACAATGGATGTC                       | F, sequencing primer, <i>bamA</i> into <i>bamB</i> (pTrc99a:: <i>His8bamABCDE</i> )                                         |
| mtd114              | GGTGTTAATCCACACAGTAACGG                         | F, sequencing primer, <i>bamB</i> second (pTrc99a:: <i>His8bamABCDE</i> )                                                   |
| mtd115              | CGTCGAAGATGGTCGTTTCGTTGCC                       | F, sequencing primer, <i>bamB</i> into <i>bamC</i> (pTrc99a:: <i>His8bamABCDE</i> )                                         |
| mtd116              | CCCAACGTGATGATGCTGGTCAGAC                       | F, sequencing primer, <i>bamC</i> second (pTrc99a:: <i>His8bamABCDE</i> )                                                   |
| mtd117              | TGACGCGCATGAAATATCTGGTGGC                       | F, sequencing primer, <i>bamD</i> first (pTrc99a:: <i>His8bamABCDE</i> )                                                    |
| mtd118              | TACTCCGTGGCCGAGTACTATACAG                       | F, sequencing primer, <i>bamD</i> into <i>bamE</i> (pTrc99a:: <i>His8bamABCDE</i> )                                         |
| mtd119              | GATGAGATCCAGCTGCACCTGCTGC                       | R, sequencing primer, <i>bamD</i> backwards into <i>bamC</i> (pTrc99a:: <i>His8bamABCDE</i> )                               |
| mtd120              | CGCATCAGGCCAGTAATTATGATC                        | F, sequencing primer, <i>bamA</i> fourth (pTrc99a:: <i>His8bamABCDE</i> )                                                   |
| mtd127              | GCGATGCGTACAACCTTTTC                            | F, sequencing primer, <i>espP</i> starting at codon 909                                                                     |
| mtd143              | GTGCGTACTGCGGTGATCAAC                           | F, sequencing primer, <i>malE</i> C-terminus coding region                                                                  |
| mtd224              | GAATATTGAACTGGTATGCGCGCAAAAAGACACC              | F, QC primer for <i>espP S953C</i> substitution                                                                             |
| mtd225              | GGTGTCTTTTGGCGCGCATACCAGTTCAATATTC              | R, QC primer for <i>espP S953C</i> substitution                                                                             |
| mtd226              | GAATATTGAACTGGTAAGCGCGCATGCGACACCAATGAAAATGTC   | F, QC primer for <i>espP K956C</i> substitution                                                                             |
| mtd227              | GACATTTTCATTTGGTGTGCGATGGCGCGCTTACCAGTTCAATATTC | R, QC primer for <i>espP K956C</i> substitution                                                                             |
| mtd228              | CTGGTAAGCGCGCAAAAAGACACCTGTGAAAATGTCTTTAAAGCC   | F, QC primer for <i>espP N959C</i> substitution                                                                             |
| mtd229              | GGCTTTAAAGACATTTTCACAGGTGTCTTTTGGCGCGCTTACCAG   | R, QC primer for <i>espP N959C</i> substitution                                                                             |
| mtd230              | GACACCAATGAAAATGTCTGTAAAGCCAGTAAACAAACCATTGG    | F, QC primer for <i>espP F963C</i> substitution                                                                             |
| mtd231              | CCAATGGTTTGTCTTACTGGCTTTACAGACATTTTCATTGGTGTCT  | R, QC primer for <i>espP F963C</i> substitution                                                                             |
| mtd232              | CACCAATGAAAATGTCTTTAAAGCCTGTAAACAAACCATTGGTTTC  | F, QC primer for <i>espP S966C</i> substitution                                                                             |
| mtd233              | GAAACCAATGGTTTGTCTTACAGGCTTTAAAGACATTTTCATTGGTG | R, QC primer for <i>espP S966C</i> substitution                                                                             |
| mtd234              | GTCTTTAAAGCCAGTAAACAATGCATTGGTTTCAGTGATGTAACGC  | F, QC primer for <i>espP T969C</i> substitution                                                                             |
| mtd235              | GCGTTACATCACTGAAACCAATGCATTGGTTTACTGGCTTTAAAGAC | R, QC primer for <i>espP T969C</i> substitution                                                                             |
| mtd236              | CCAGTAAACAACCATTGGTTTCTGTGATGTAACGCC            | F, QC primer for <i>espP S973C</i> substitution                                                                             |
| mtd237              | GGCGTTACATCACAGAAACCAATGGTTTGTTTACTGG           | R, QC primer for <i>espP S973C</i> substitution                                                                             |
| mtd238              | CCATTGGTTTCACTGATGTATGCCCGGTCATTACAACCCAGGG     | F, QC primer for <i>espP T976C</i> substitution                                                                             |
| mtd239              | CCCTGGTTGTAATGACCCGGGCATACACTGAAACCAATGG        | R, QC primer for <i>espP T976C</i> substitution                                                                             |
| mtd240              | GATGTAACGCCGGTCATTTGCACCAGGGAAACCCGATGAC        | F, QC primer for <i>espP T980C</i> substitution                                                                             |

Continued next page

|                               |                                                                                                                                                                                                                 |                                                                                                 |
|-------------------------------|-----------------------------------------------------------------------------------------------------------------------------------------------------------------------------------------------------------------|-------------------------------------------------------------------------------------------------|
| mtd241                        | GTCATCGGTTTCCCTGGTGCAAATGACCGCGGTTACATC                                                                                                                                                                         | R, QC primer for <i>espP T980C</i> substitution                                                 |
| mtd293                        | CAACGGCGAAGCCGCTGCATGGGCACGCATC                                                                                                                                                                                 | F, QC primer for <i>espP G1040A</i> substitution                                                |
| mtd294                        | GATGCGTGCCCATGCAGCGGCTTCGCCGTTG                                                                                                                                                                                 | R, QC primer for <i>espP G1040A</i> substitution                                                |
| mtd295                        | CGAAGCCGGTGCAGCGGCACGCATCATG                                                                                                                                                                                    | F, QC primer for <i>espP W1042A</i> substitution                                                |
| mtd296                        | CATGATGCGTGCCGCTGCACCGGCTTCG                                                                                                                                                                                    | R, QC primer for <i>espP W1042A</i> substitution                                                |
| mtd297                        | CGAAGCCGGTGCATTTCACGCATCATGAGCGG                                                                                                                                                                                | F, QC primer for <i>espP W1042F</i> substitution                                                |
| mtd298                        | CCGCTCATGATGCGTGCAAATGCACCGGCTTCG                                                                                                                                                                               | R, QC primer for <i>espP W1042F</i> substitution                                                |
| mtd309                        | GCCAGTAAACAAACCATTTGTTTCAGTGATGTAACGCC                                                                                                                                                                          | F, QC primer for <i>espP G971C</i> substitution                                                 |
| mtd310                        | GGCGTTACATCACTGAAACAAATGGTTTGTACTGGC                                                                                                                                                                            | R, QC primer for <i>espP G971C</i> substitution                                                 |
| mtd313                        | CAGTGATGTAACGCCGTGCATTACAACAGGAAACCG                                                                                                                                                                            | F, QC primer for <i>espP V978C</i> substitution                                                 |
| mtd314                        | CGGTTCCCTGGTTGTAATGCACGGCGTTACATCACTG                                                                                                                                                                           | R, QC primer for <i>espP V978C</i> substitution                                                 |
| mtd322                        | GCGTGAGCTTCCAGGCTGGTTGCCAGCAGGATAACTGG                                                                                                                                                                          | F, QC primer for BamA <i>V444C</i> substitution                                                 |
| mtd323                        | CCAGTTATCCTGCTGGCAACCAGCCTGGAAGCTCACGC                                                                                                                                                                          | R, QC primer for BamA <i>V444C</i> substitution                                                 |
| mtd324                        | GGTTAGGTACAGGTTATGCTGTTGTATCAACGGGACC                                                                                                                                                                           | F, QC primer for BamA <i>G457C</i> substitution                                                 |
| mtd325                        | GGTCCCCTGTGATACAACAGCATAAACCTGTACCTAACCC                                                                                                                                                                        | R, QC primer for BamA <i>G457C</i> substitution                                                 |
| mtd330                        | CCGGTCATTACAACAGGGAATGCGGCGAAAACCTGTATTTTCAG                                                                                                                                                                    | F, QC primer for <i>espP T984C</i> substitution                                                 |
| mtd331                        | CTGAAAATACAGGTTTTTCGCCGATTCCCTGGTTGTAATGACCGG                                                                                                                                                                   | R, QC primer for <i>espP T984C</i> substitution                                                 |
| mtd339                        | CGAGGTCAACAACCTGTGCAACGTATGGGTGACC                                                                                                                                                                              | F, QC primer for <i>espP N1026C</i> substitution                                                |
| mtd340                        | GGTCACCCATACGTTTGCACAGGTTGTTGACCTCG                                                                                                                                                                             | R, QC primer for <i>espP N1026C</i> substitution                                                |
| mtd341                        | GGTCAACAACCTGAACAAGCTATGGGTGACCTGCG                                                                                                                                                                             | F, QC primer for <i>espP R1028A</i> substitution                                                |
| mtd342                        | CGCAGGTACCCATAGCTTTGTTTCAGGTTGTTGACC                                                                                                                                                                            | R, QC primer for <i>espP R1028A</i> substitution                                                |
| mtd343                        | GGTCAACAACCTGAACAAGCTGCGGGTGACCTGCGTGATATC                                                                                                                                                                      | F, QC primer for <i>espP M1029A</i> substitution                                                |
| mtd344                        | GATATCACGCAGGTACCCGCACGTTTGTTCAGGTTGTTGACC                                                                                                                                                                      | R, QC primer for <i>espP M1029A</i> substitution                                                |
| mtd345                        | CCTGAACAAACGTATGGGTTGCCTGCGTGATATCAACGG                                                                                                                                                                         | F, QC primer for <i>espP D1031C</i> substitution                                                |
| mtd346                        | CCGTTGATATCACGCAGGCAACCCATACGTTTGTTCAGG                                                                                                                                                                         | R, QC primer for <i>espP D1031C</i> substitution                                                |
| mtd347                        | GTGGGGCTGGCCTGTTTGCTTCGCCATGTTTGATTCC                                                                                                                                                                           | F, QC primer for <i>espP Y1108F</i> substitution                                                |
| mtd348                        | GGAATCAAACATGGCGGAAGCAAACAGGCCAGCCCCAC                                                                                                                                                                          | R, QC primer for <i>espP Y1108F</i> substitution                                                |
| <b>Linear dsDNA fragments</b> |                                                                                                                                                                                                                 |                                                                                                 |
| mtd126                        | CTTGCAATTATGTTTTTAGGCTTATTACAATCCTCATATTCTTTTGC<br>GGCCTGGTCTCATCCGCAGTTTGAAAAGGGTGGCGGGAGCGGTGGCG<br>GTAGCGGTGGCTCCGCGTGGAGCCATCCGCAGTTTGAAAAGGGTGGC<br>TATCGGATGCGTACAAACCTTTCTGAATCAGACAACTGGAGGTCAA<br>AAAC | Fragment containing TwinStrepII-tag to assemble with pMTD607 after amplification with mtd96/127 |

**Supplementary Table 3: Oligonucleotides and double-stranded DNA fragments used in this study, related to STAR Methods.**

F = forward strand, R = reverse strand, SP = signal peptide, GA = Gibson assembly, QC = QuikChange
